# Supplementary material
Source: PubMed Central journal article supplement (PMC2844165)
Supplement: supp_M109.053942_jbc.M109.053942-1.pdf [file supp_M109.053942_jbc.M109.053942-1.pdf]

## SUPPLEMENTARY INFORMATION

Supplementary Fig. 1. **Expression levels of marker genes in interscapular BAT (IBAT) and epididymal WAT (eWAT).** Representative Northern blot. Total RNA (10  $\mu$ g) isolated from IBAT and eWAT of NMRI mice housed at 22 °C was used for each lane, and the blot was hybridized with aP2, PPAR $\gamma$ , PGC-1 $\alpha$ , UCP1 and 18S rRNA probes.

Supplementary Fig. 2. **Expression levels of marker genes during spontaneous differentiation of white and brown adipocytes.** (a) White and brown adipocyte cultures were examined with phase-contrast microscopy after 7 days in culture. (b)-(f) Primary cultures of white and brown adipocytes were grown for the indicated number of days. Where indicated, 1  $\mu$ M norepinephrine (NE) had been added 2 h before harvest. (b) Representative Northern blot. Total RNA (10  $\mu$ g) was used per lane and the blot was hybridized with aP2, PPAR $\gamma$ , PGC-1 $\alpha$ , UCP1 and 18S rRNA probes. (c) aP2, (d) PPAR $\gamma$ , (e) PGC-1 $\alpha$  and (f) UCP1 mRNA levels during spontaneous differentiation of white and brown adipocytes. The aP2, PPAR $\gamma$ , PGC-1 $\alpha$  and UCP1 mRNA levels were normalized to the 18S rRNA levels in each sample. The points represent means  $\pm$  S.E. of three independent experiments, each performed in duplicate. The brown adipocyte control levels of aP2 and PPAR $\gamma$  and the NE-induced levels of PGC-1 $\alpha$  and UCP1 at day 7 were set in each experiment to 100 %, and the white/brown adipocyte aP2, PPAR $\gamma$ , PGC-1 $\alpha$  and UCP1 mRNA levels on different days were expressed relative to this value in each individual experiment. The aP2 ( $p < 0.0001$ ), the PGC-1 $\alpha$  ( $p < 0.0001$ ), the PGC-1 $\alpha$  ( $p < 0.0001$ ) and the UCP1 ( $p < 0.0001$ ) mRNA levels were significantly higher in brown adipocytes (two-way ANOVA with replicates, cell type vs. time in culture).

Supplementary Fig. 3. **Rosiglitazone does not favour growth of brown over white adipocytes.** Primary cultures of white adipocytes originating from UCP1-KO mice and brown adipocytes originating from UCP1-wild type mice were grown for 7 days separately or in co-culture in the indicated ratios in the absence (left panel) or presence of 1  $\mu$ M rosiglitazone (right panel). Where indicated, 1  $\mu$ M norepinephrine (NE) had been added 2 h before harvest. Representative Northern blot. Total RNA (10  $\mu$ g) was used per lane and the blot was hybridized with the UCP1 and 18S rRNA probes. Arrows indicate wild type (WT) and knockout (KO) UCP1 transcripts. Since rosiglitazone in UCP1-KO cells induces a transcript that co-migrates with the predominant UCP1-WT transcript, the genetic identity of the cells was verified by RT-PCR (Suppl. Fig. 3).

Supplementary Fig. 4. **Verification of genetic identity of UCP1-KO and UCP1-WT adipocytes.** Rosiglitazone-treated samples from the same experiment as in Fig. 3 and Supplementary Fig. 2 were analysed by Reverse Transcriptase-PCR to validate the genotype of the UCP1-wild type and UCP1-KO cells. UCP1-KO mice had been generated by deleting exon 2 and part of exon 3 of UCP1 gene (Enerbäck et al. 1997). Thus, we used a forward primer annealing in exon 1 and a reverse primer annealing in exon 2 of UCP1 mRNA. PCR product was predicted to be 457 bp long in UCP1-WT mice and to be absent in UCP1-KO mice. The outcome of experiment confirmed genetic identity of UCP1-KO and UCP1-WT mice.

Forward primer: CTGGGCTTAACGGGTCCTC

Reversed primer: GGCAGACCGCTGTACAGTTT

Supplementary Fig. 5. **Only a subset of cells in rosiglitazone-treated white adipocyte cultures is UCP1-positive and demonstrates NE-induced UCP1-dependent thermogenesis** – To improve

contrast, the black background in Fig. 6ab was altered to white (no areas with triple staining were observed in this study).

Petrovic\_SupplementaryFig1.

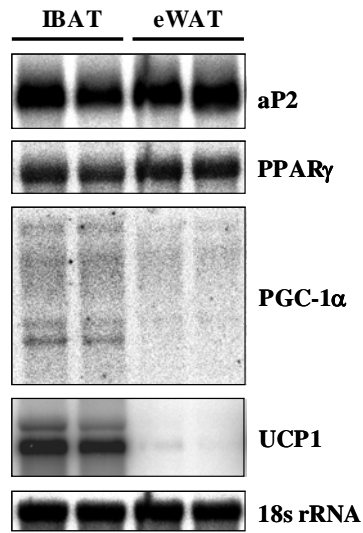

Petrovic\_SupplementaryFig2.

a)

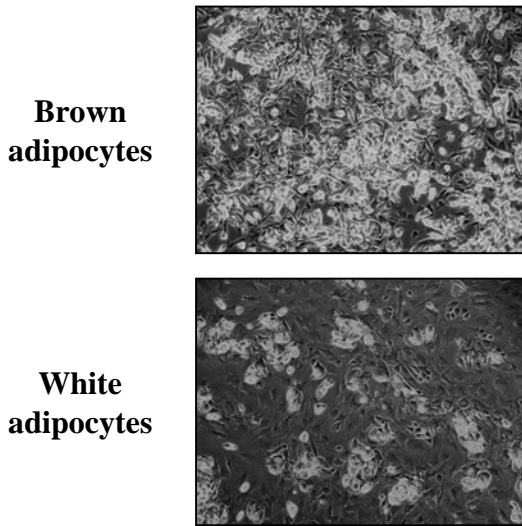

b)

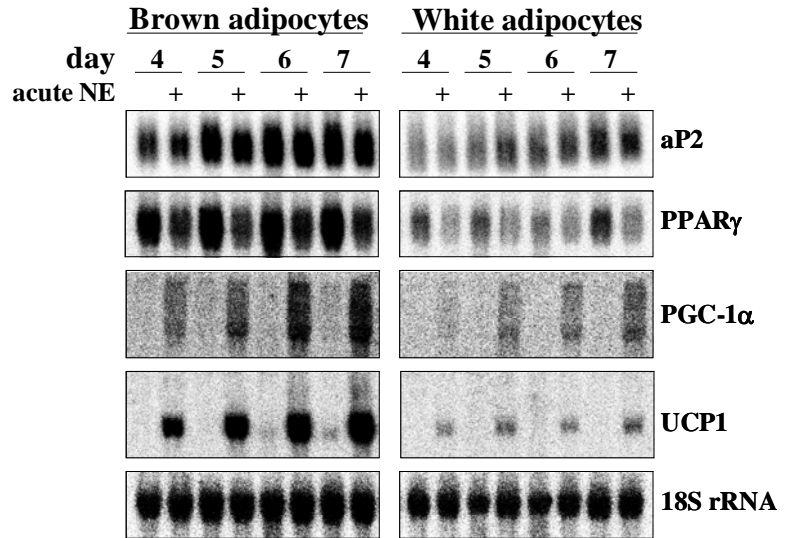

c)

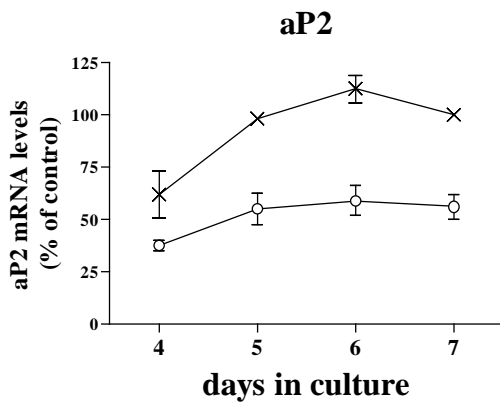

d)

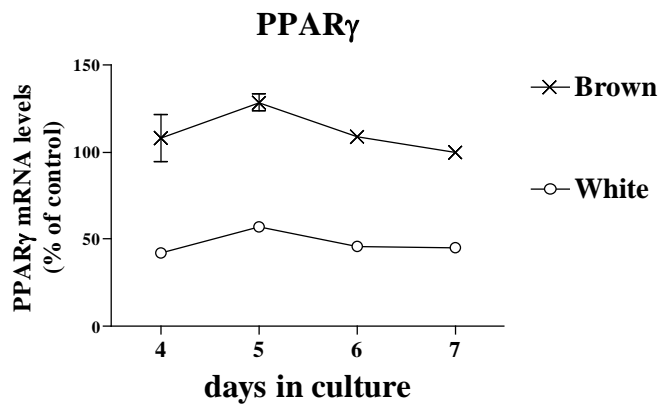

e)

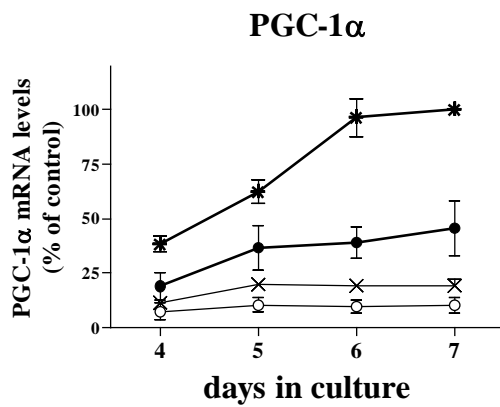

f)

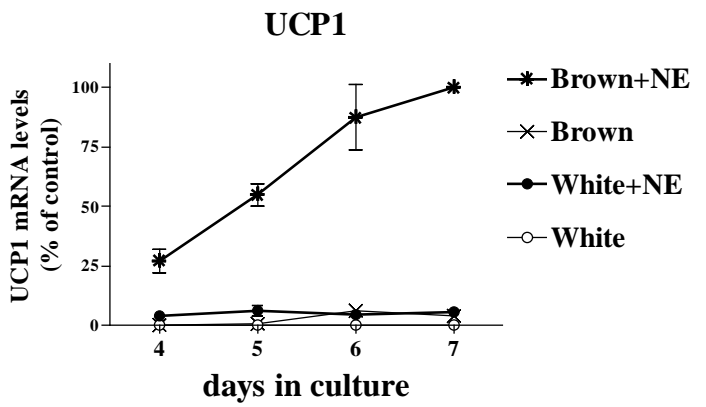

**Control cultures**

**Rosiglitazone-treated cultures**

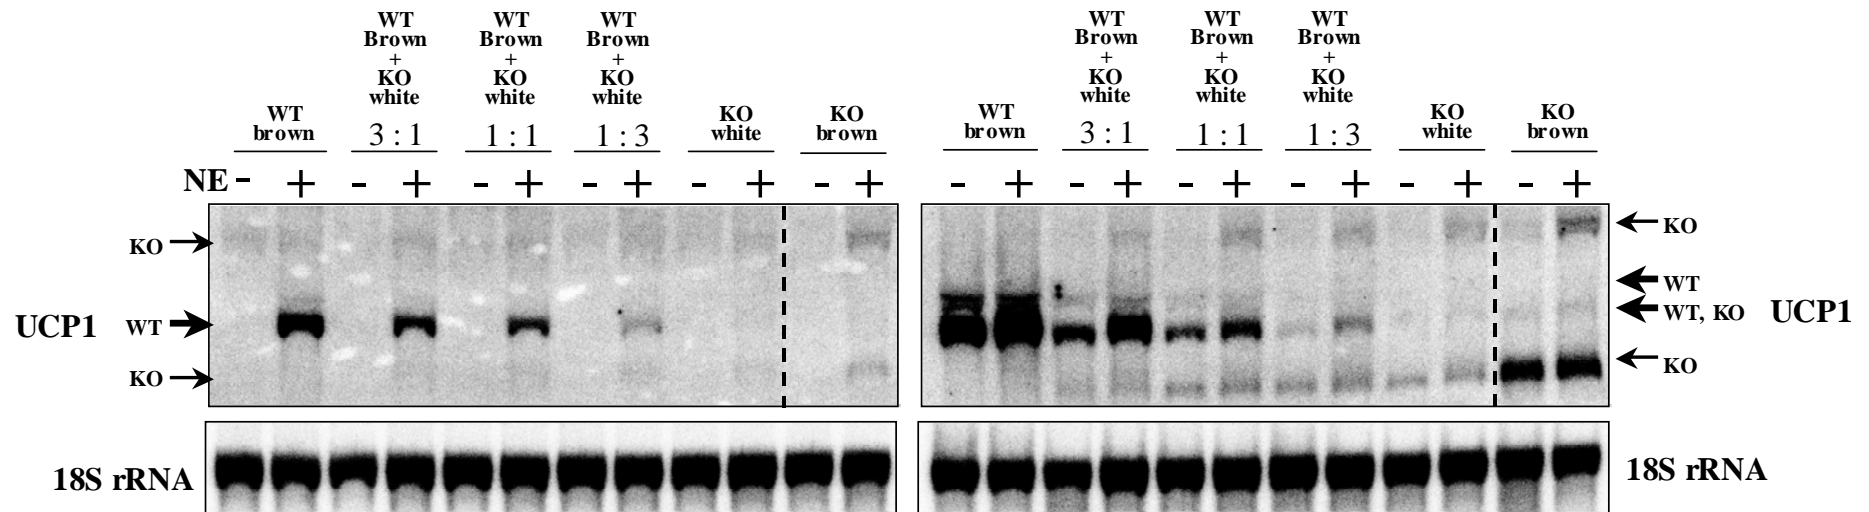

## Petrovic\_SupplementaryFig4.

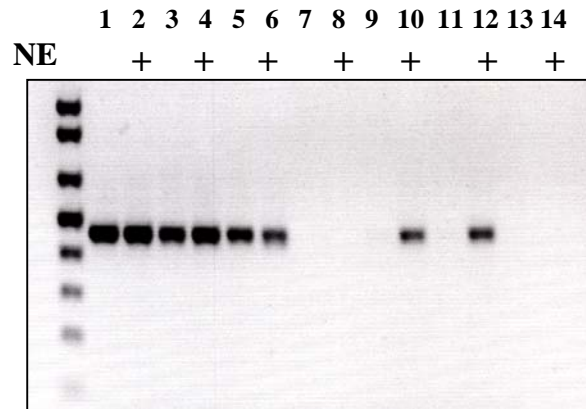

1, 2 – brown adipocytes - WT

3, 4 – brown adipocytes - WT; white adipocytes - KO; 3:1

5, 6 – brown adipocytes - WT; white adipocytes - KO; 1:1

7, 8 – brown adipocytes - KO

9, 10 – brown adipocytes - KO; white adipocytes - WT; 1:1

11, 12 – white adipocytes - WT

13, 14 – white adipocytes - KO

a)

White adipocytes  
Control      White adipocytes  
Rosiglitazone

VDAC

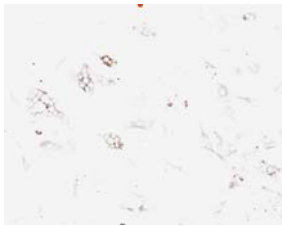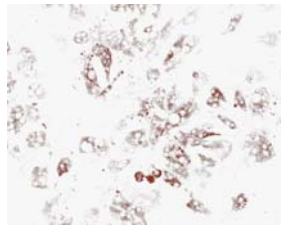

UCP1

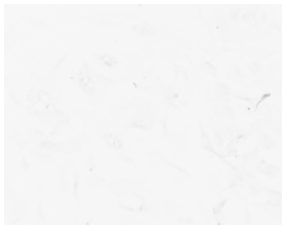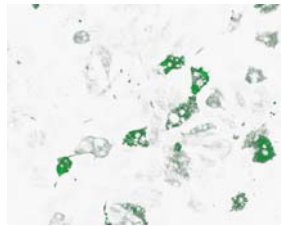

VDAC  
UCP1  
nuclei

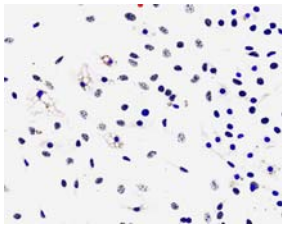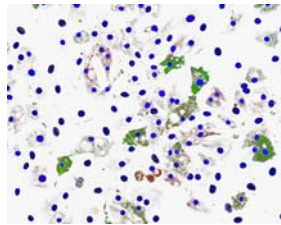

b)

White adipocytes  
Control      White adipocytes  
Rosiglitazone

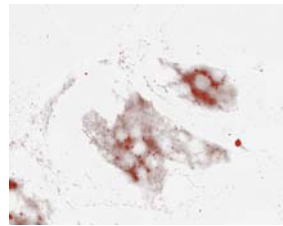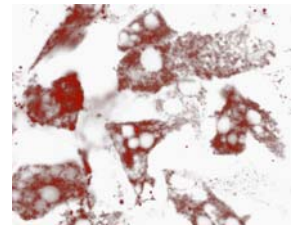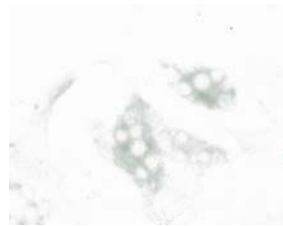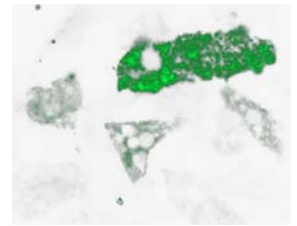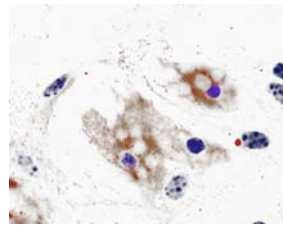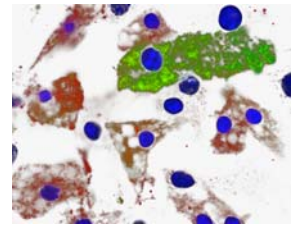



Table S1. Primers used for qRT-PCR analysis

| <b>Gene</b>    | <b>Forward primer (5' - 3')</b> | <b>Reverse primer (5' - 3')</b> |
|----------------|---------------------------------|---------------------------------|
| PPAR $\alpha$  | CCGAGGGCTCTGTCATCA              | GGGCAGCTGACTGAGGAA              |
| CPT-1M         | TGCCTTTACATCGTCTCCAA            | GGCTCCAGGGTTCAGAAAGT            |
| Elovl3         | GCCTCTCATCCTCTGGTCCT            | TGCCATAAACTTCCACATCCT           |
| Cidea          | TGCTCTTCTGTATCGCCCAGT           | GCCGTGTTAAGGAATCTGCTG           |
| PGC-1 $\alpha$ | GAAAGGGCCAAACAGAGAGA            | GTAAATCACACGGCGCTCTT            |
| UCP1           | GGCCTCTACGACTCAGTCCA            | TAAGCCGGCTGAGATCTTGT            |
| Myogenin       | CTACAGGCCTTGCTCAGCTC            | TGGGAGTTGCATTCACTGG             |
| Zic1           | AACCTCAAGATCCACAAAAGGA          | CCTCGAACTCGCACTTGAA             |
| Lhx8           | GAGCTCGGACCAGCTTCA              | TTGTTGTCCTGAGCGAACTG            |
| Meox2          | CTTTGACCCGCTTCCACTT             | AATCTAGACCTCACTGAAAGACAGG       |
| PRDM16         | CAGCACGGTGAAGCCATTC             | GCGTGCATCCGCTTGTG               |
| Igfbp3         | GCAGCCTAAGCACCTACCTC            | TCCTCCTCGGACTCACTGAT            |
| DPT            | CTGCCGCTATAGCAAGAGGT            | TGGCTTGGGTACTCTGTTGTC           |
| Tcf21          | CATTCACCCAGTCAACCTGA            | TTCCTTCAGGTCATTCTCTGG           |
| Hoxc9          | GCAGCAAGCACAAAGAGGAGAAG         | GCGTCTGGTACTTGGTGTAGGG          |
| TBP            | ACGGACAACCTGCGTTGATTT           | TTCTTGCTGCTAGTCTGGATTG          |
